# Supplementary material for: Outcomes, patient acceptable symptom state, complications, and predictors after surgical correction of adult spinal deformity – a retrospective observational study
Source: Research Square preprint supplement (doi:10.21203/rs.3.rs-7054892/v1), 2025-07-31
Supplement: Supplementary file 1 [file 98b83e613b8bf5260d1d8509.docx]

| **Appendix 1.0 Univariate and multivariate linear regression analysis for Oswestry disability index (ODI) as the primary outcome on original data and after multiple imputation** | | | | | | | | | | | | | | | | | | | | |
| --- | --- | --- | --- | --- | --- | --- | --- | --- | --- | --- | --- | --- | --- | --- | --- | --- | --- | --- | --- | --- |
| Primary outcome, ODI | Original data | | | | | | | |  | Imputed data | | | | | | | | | | |
|  | Univariate analysis (N=59/82) | | | |  | Multivariate analysis (N=59/82) | | |  |  | Univariate analysis (N=82/82) | | | Multivariate analysis (N=82/82) | | | | | |  |
| **Varaible** | **B** | **95% CI** | **P-value** | **R-Square** | **B** | **95% CI** | **P-value** | **R-Square** | **MI1 x20** | **B** | **95% CI** | **P-value** | **R-Square** | **B** | **95% CI** | | | **P-value** | | **R-Square** |
| Age | 0.2 | -0.3, 0.6 | 0.423 | 0.011 |  |  |  |  |  |  |  |  | Ø |  |  | | |  | |  |
| ASA | 1.0 | -8.5, 10.4 | 0.840 | 0.001 |  |  |  |  |  |  |  |  |  |  |  | | |  | |  |
| BMI | 0.9 | -0.3, 2.1 | 0.140 | 0.038 | 1.1 | -0.05, 2.2 | 0.061 |  | x | 0.8 | -0.5, 2.1 | 0.222 | 0.029 | 1.0 | | -0.2, 2.2 | 0.106 | |  | |
| Gender, female | 12.2 | 1.4, 23.0 | 0.028 | 0.082 | 12.6 | 2.1, 23.0 | 0.019 |  | x | 11.1 | 0.004, 22.2 | 0.050 | 0.069 | 12.4 | | 1.7, 23.1 | 0.024 | |  | |
| Prior surgery spine, yes | -0.5 | -11.6, 10.6 | 0.928 | 0.000 |  |  |  |  |  |  |  |  |  |  | |  |  | |  | |
| Smoking, yes | 15.7 | 1.6, 30.0 | 0.030 | 0.080 | 14.4 | 1.0, 27.9 | 0.036 |  | x | 12.9 | -1.8, 27.6 | 0.084 | 0.072 | 14.6 | | 0.6, 28.7 | 0.041 | |  | |
| Surgeon | -0.3 | -1.4, 0.9 | 0.634 | 0.004 |  |  |  |  |  |  |  |  |  |  | |  |  | |  | |
|  |  |  |  |  | Multivariate R-Square 0.202 | | | |  |  |  |  |  | Multivariate R-Square 0.193 | | | | | | |
| ODI Mean | 39.0 |  |  |  |  |  |  |  |  | 39.6 |  |  |  |  | |  |  | |  | |
| ODI SD | 21.0 |  |  |  |  |  |  |  |  | 21.3 |  |  |  |  | |  |  | |  | |
| **Assuming BMI is a Collider Bias:** | | | | | | | | |  |  |  |  |  |  | |  |  | |  | |
| Gender, female |  |  |  |  | 11.3 | 0.7, 21.9 | 0.037 |  | x |  |  |  |  | 12.8 | | -22.5, -1.1 | 0.031 | |  | |
| Smoking |  |  |  |  | 14.5 | 0.7, 28.3 | 0.040 |  | x |  |  |  |  | 13.8 | | -0.5, 28.0 | 0.059 | |  | |
|  |  |  |  |  | Multivariate R-Square 0.149 | | | |  |  |  |  |  | Multivariate R-Square 0.149 | | | | | | |
| 1Multiple imputation |  |  |  |  |  |  |  |  |  |  |  |  |  |  | | | | | | |
